# Supplementary material
Source: PubMed Central journal article supplement (PMC4206532)
Supplement: auto-10-1522-s01.pdf [file auto-10-1522-s01.pdf]

## **Supplemental Material to:**

**Huaiping Zhu, Marc Foretz, Zhonglin Xie, Miao Zhang,  
Zhiren Zhu, Junjie Xing, Jocelyne Leclerc, Murielle Gaudry,  
Benoit Viollet, and Ming-Hui Zou**

**PRKAA1/AMPK $\alpha$ 1 is required for autophagy-dependent  
mitochondrial clearance during erythrocyte maturation**

**Autophagy 2014; 10(9)**

**<http://dx.doi.org/10.4161/auto.29197>**

**[www.landesbioscience.com/journals/autophagy/article/29197](http://www.landesbioscience.com/journals/autophagy/article/29197)**

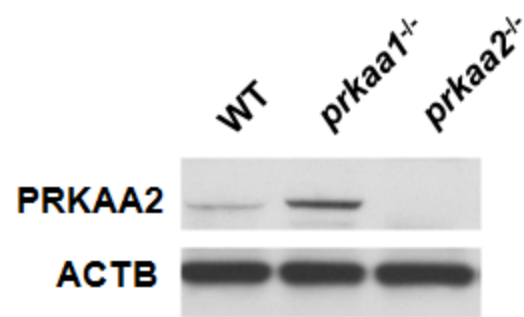

**Figure S1.** Western blot analysis of the expression of PRKAA2/AMPK $\alpha$ 2 in MEFs. Anti-PRKAA2 antibody was used to determine the expression of PRKAA2 in WT, *prkaa1*<sup>-/-</sup>, and *prkaa2*<sup>-/-</sup> MEFs.

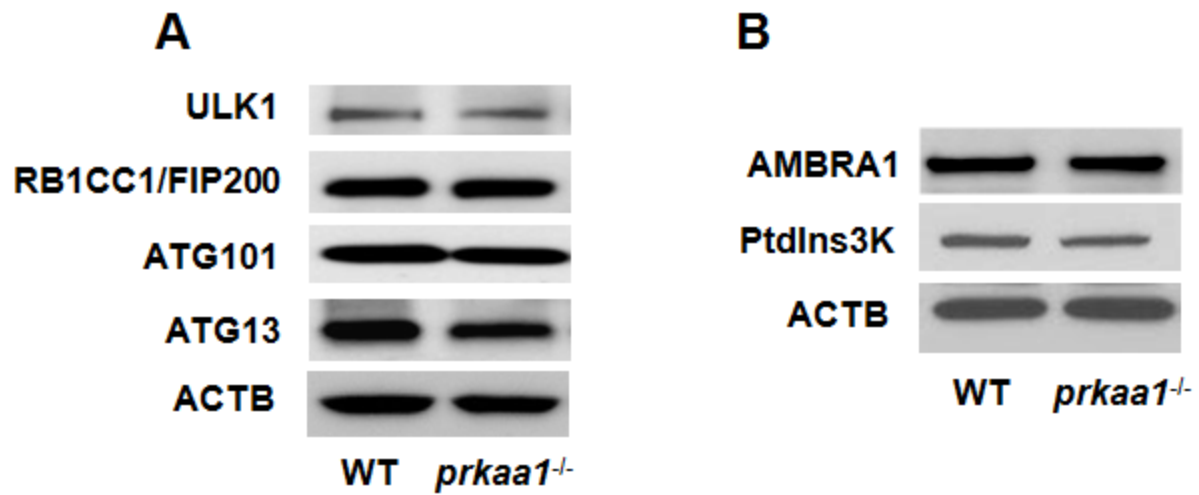

**Figure S2.** Reduced ULK1 phosphorylation has no effect on the expression of the components in ULK1 and BECN1-PtdIns3K complexes in MEFs. **(A)** The expression of ULK1, RB1CC1/FIP200, ATG101, and ATG13 in WT and *prkaa1*<sup>-/-</sup> MEFs. **(B)** The expression of AMBRA1 and PtdIns3K in WT and *prkaa1*<sup>-/-</sup> MEFs was analyzed by western blotting.

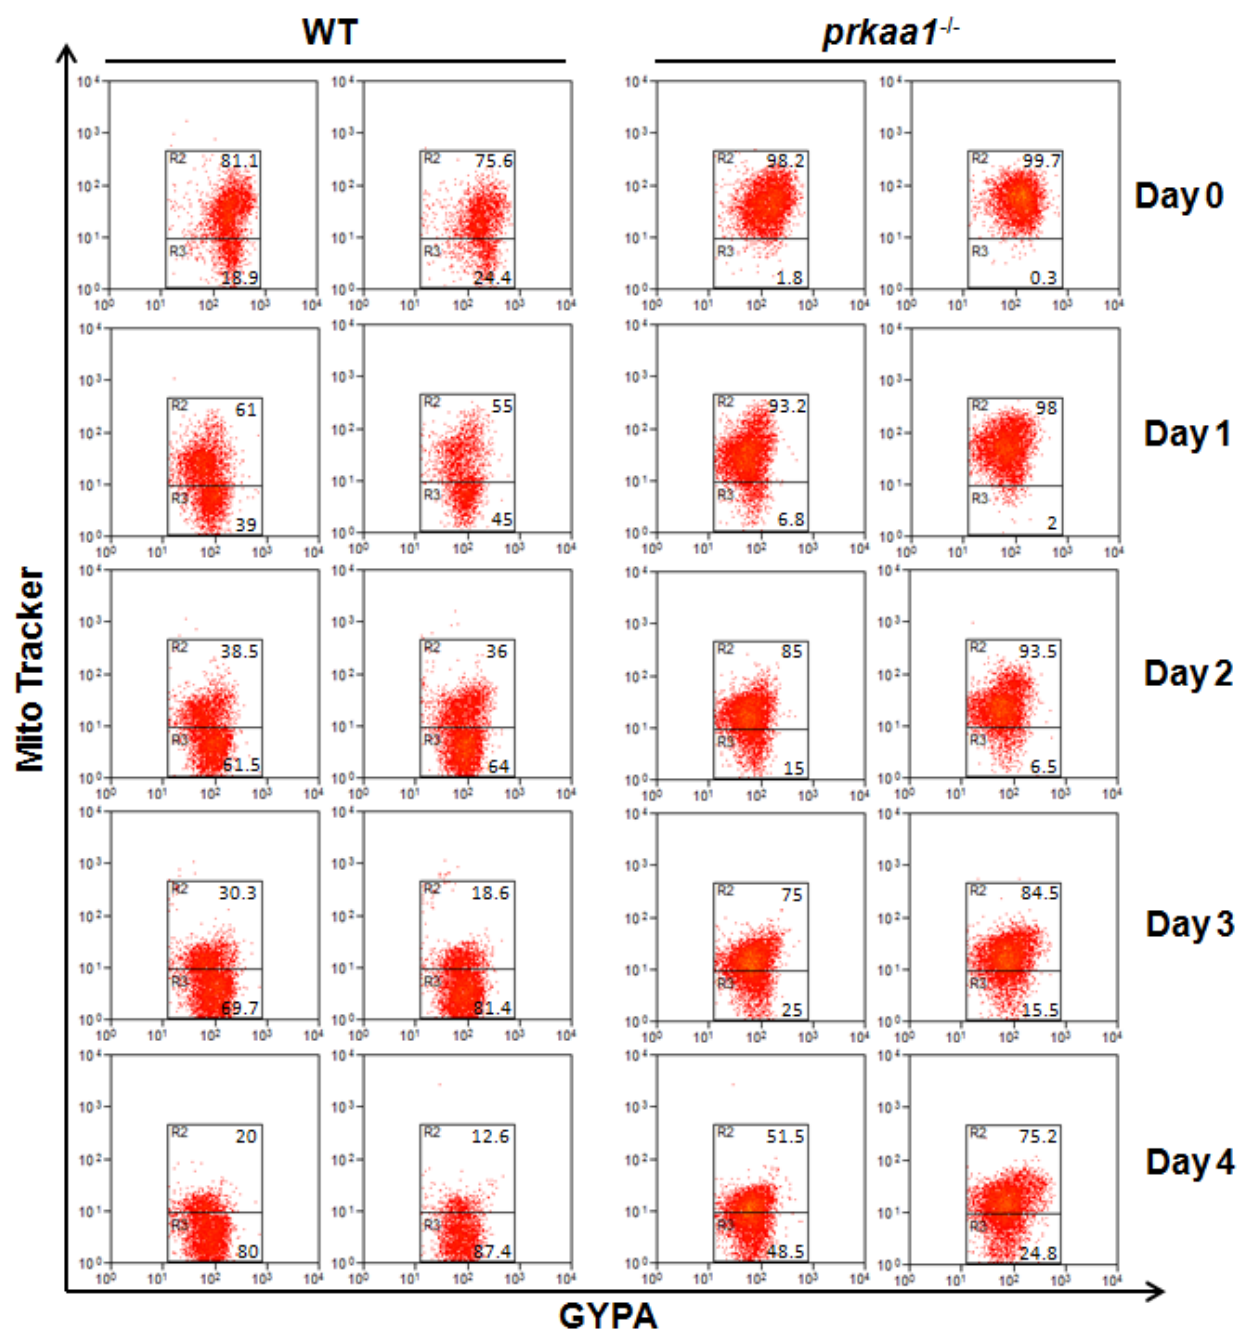

**Figure S3.** Contour plots of flow cytometry analysis of reticulocytes undergoing erythroid maturation. Reticulocytes were cultured for in vitro maturation for 0, 1, 2, 3, and 4 days. The cells were stained for MitoTracker Deep Red and GYPA, and analyzed by flow cytometry.

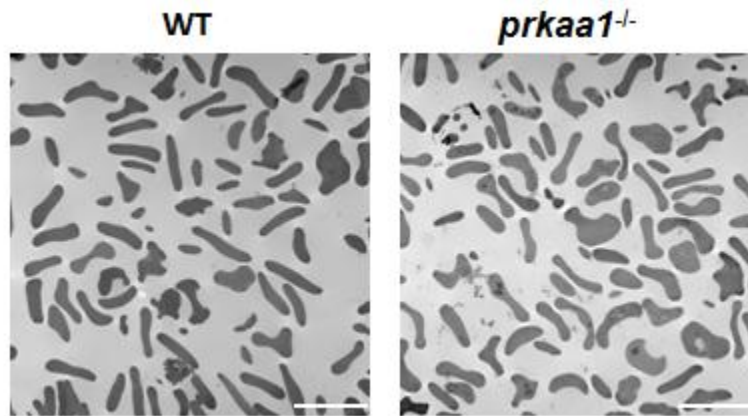

**Figure S4.** Representative electron micrographs of WT and *prkaa1*<sup>-/-</sup> peripheral blood erythrocytes. Electron micrographs of erythrocytes from WT and *prkaa1*<sup>-/-</sup> mice. Scale bar: 10  $\mu$ m.

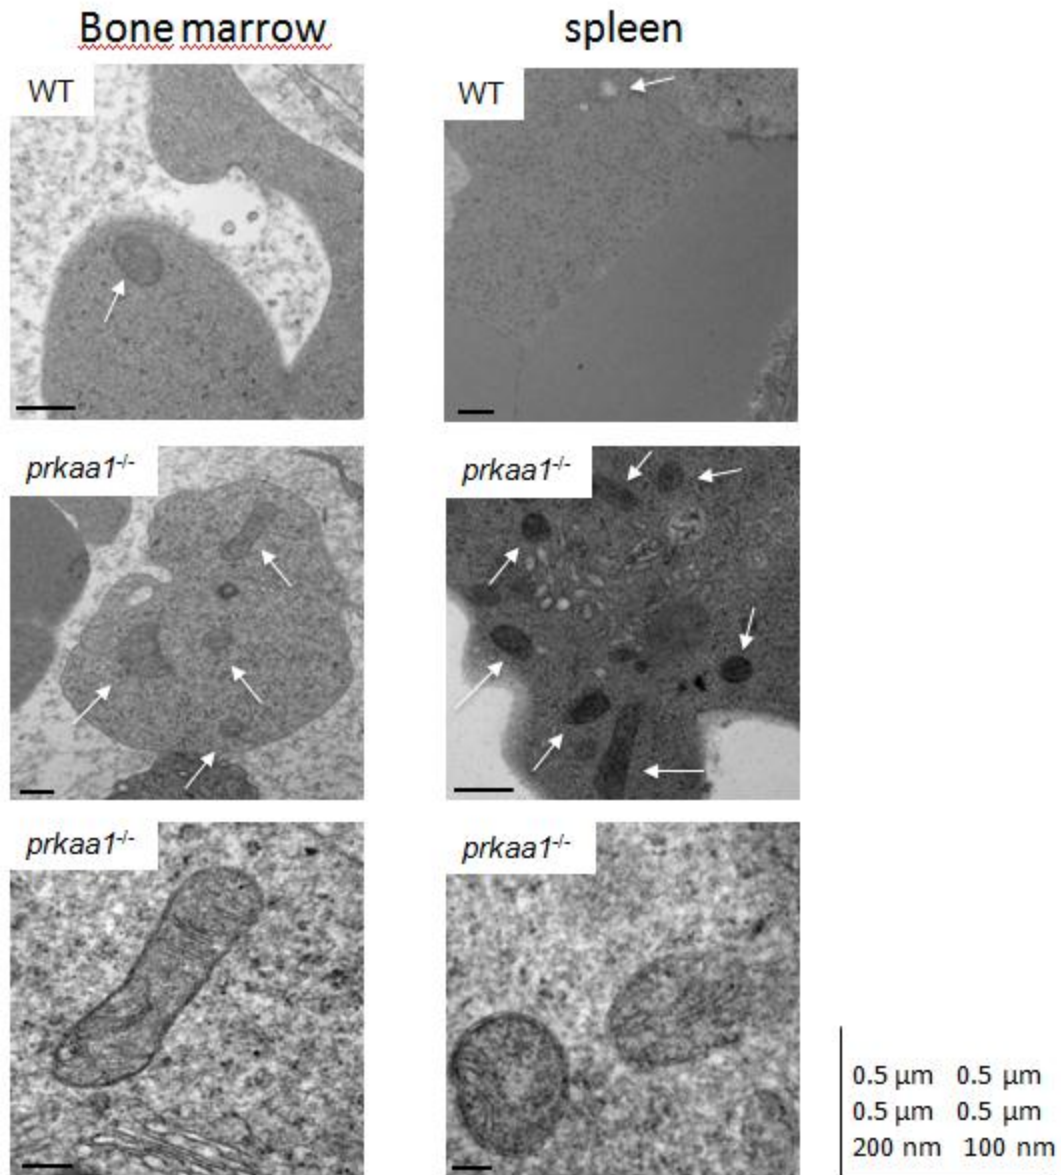

**Figure S5.** Representative electron micrographs of WT and *prkaa1<sup>-/-</sup>* erythroid cells isolated from bone marrow and spleen. Electron micrographs of bone marrow and spleen erythroid cells isolated from WT and *prkaa1<sup>-/-</sup>* mice. Arrow indicates mitochondrial structures.

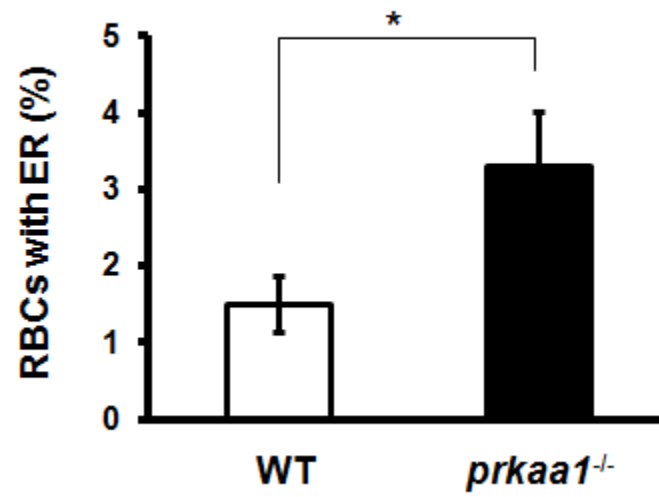

**Figure S6.** Percentage of erythrocytes containing ERs. Peripheral blood erythrocytes were staining by ER-Tracker Green and analyzed by flow cytometry. n = 8, \*  $P < 0.05$  vs. WT.

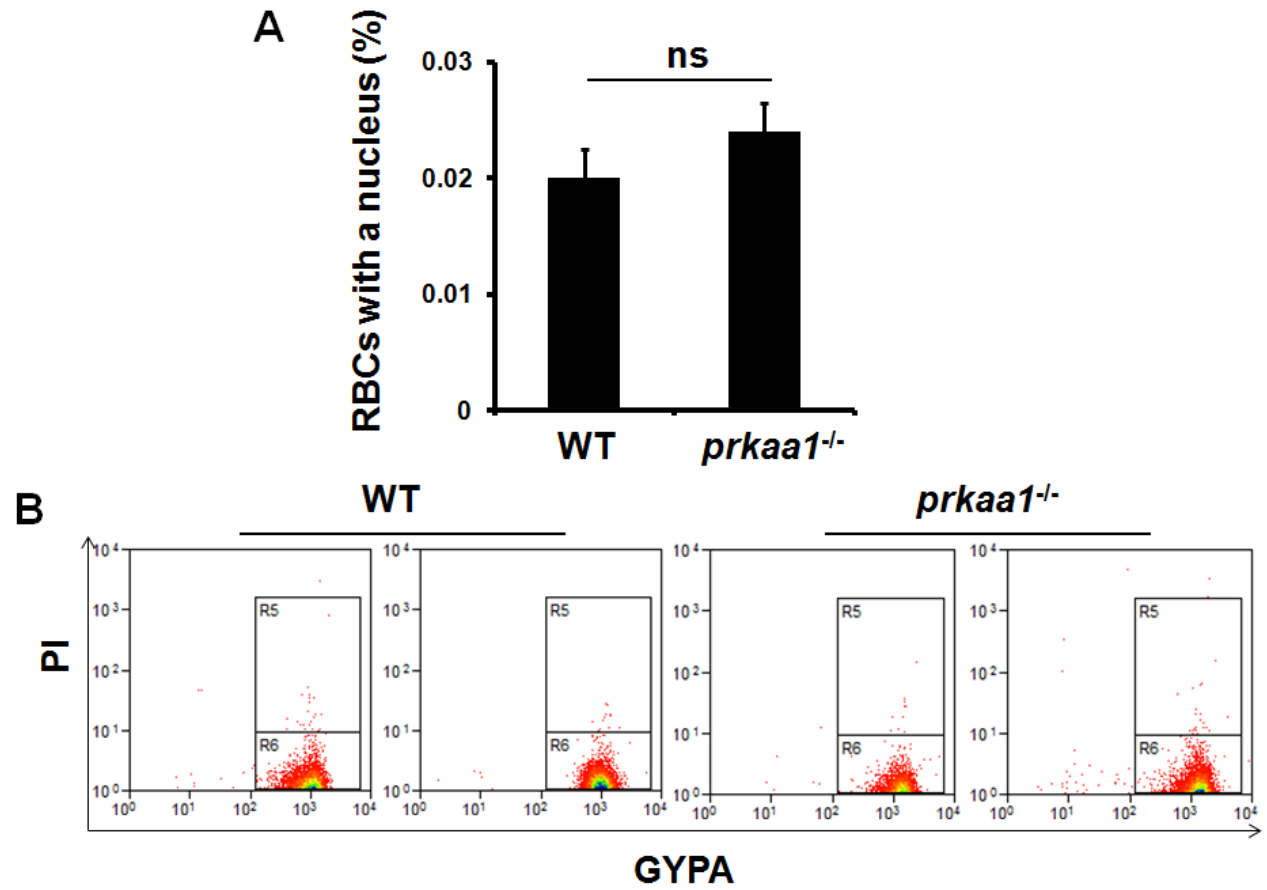

**Figure S7.** Percentage of erythrocytes containing nuclei. RBCs were labeled with APC -GYPA, nuclei were stained with PI (Invitrogen) and cells were analyzed by flow cytometry. n = 8; ns, not significant.

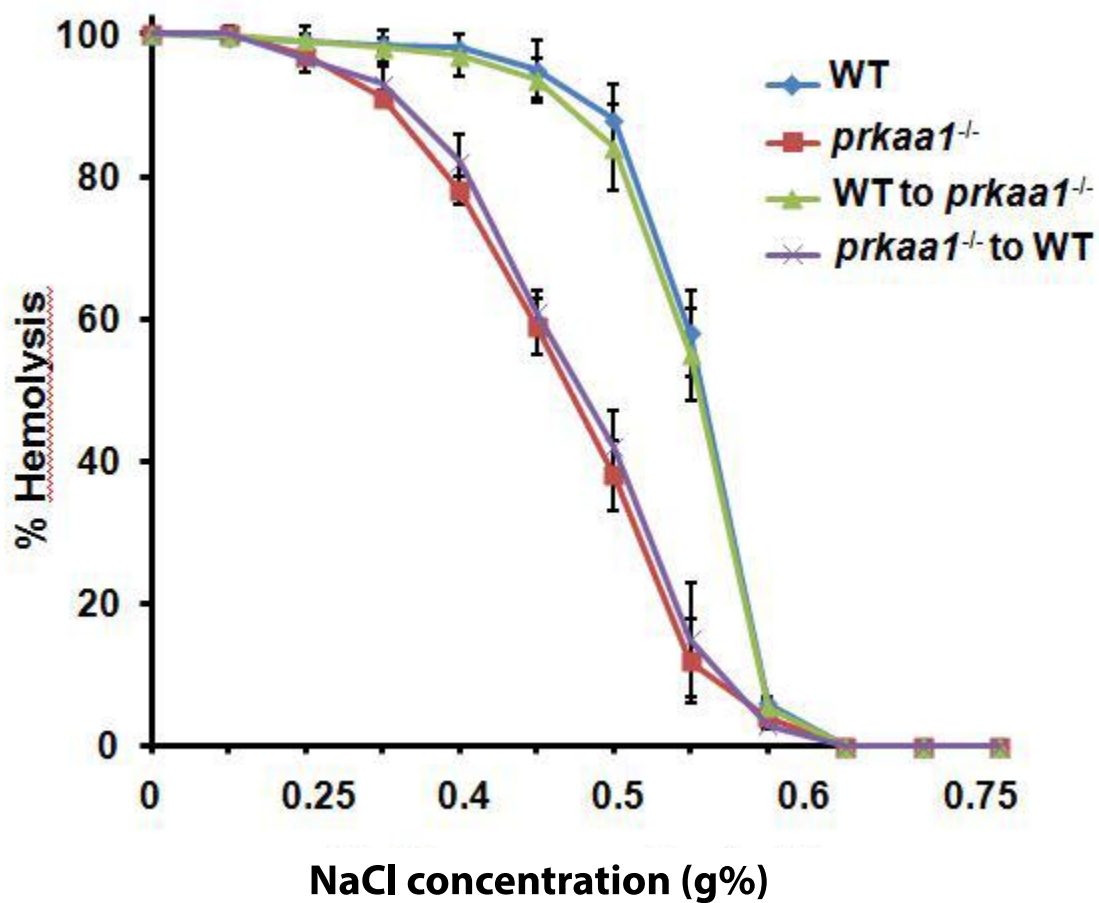

**Figure S8.** Assay of osmotic fragility of erythrocytes. The osmotic fragility of erythrocytes was assessed in WT and *prkaa1*<sup>-/-</sup> mice, as well as WT recipients transplanted with *prkaa1*<sup>-/-</sup> bone marrow cells and *prkaa1*<sup>-/-</sup> recipients transplanted with WT bone marrow cells. Peripheral blood erythrocytes were exposed to various concentrations of NaCl (%), the supernatant fraction was collected for assessing hemolysis by spectrometry. A fragility curve was generated by plotting various NaCl concentrations versus hemolysis (n = 5).
